# Supplementary material for: Benchmark dataset for undirected and Mixed Capacitated Arc Routing Problems under Time restrictions with Intermediate Facilities
Source: PubMed Central journal article supplement (PMC4961348; doi:10.1016/j.dib.2016.06.067), 2016-07-06
Supplement: mmc1.pdf [file mmc1.pdf]

Conflicts of interest: none
